# Supplementary material for: Copper(II) Prevents the Saccarine-Dialkylcyanamide Coupling by Forming Mononuclear (Saccharinate)(Dialkylcyanamide)copper(II) Complexes
Source: MDPI journal article supplement (doi:10.3390/inorganics9090069), 2021-09-08
Supplement: s1 [file s1]

# Copper(II) Prevents the Saccharine-Dialkylcyanamide Coupling Forming Mononuclear (Saccharinate)(Dialkylcyanamide)copper(II) Complexes

Yulia N. Toikka, Dar'ya V. Spiridonova, Alexander S. Novikov and Nadezhda A. Bokach \*

Institute of Chemistry, Saint Petersburg State University, 7/9 Universitetskaya Nab., 199034 Saint Petersburg, Russia; helmi24@mail.ru (Y.N.T.); spiridonovadarya@mail.ru (D.V.S.); ja2-88@mail.ru (A.S.N.)

\* Correspondence: n.bokach@spbu.ru

## Crystal data and structure refinement

**Table S1.** Crystal data and structure refinement for **1**, **1·2H<sub>2</sub>O**, **3·2THF**, and **[Cu(sac)<sub>2</sub>(H<sub>2</sub>O)<sub>4</sub>]·2H<sub>2</sub>O**.

| Sample                                      | <b>1</b>                                                                       | <b>1·2H<sub>2</sub>O</b>                                                        | <b>3·2THF</b>                                                                  | <b>[Cu(sac)<sub>2</sub>(H<sub>2</sub>O)<sub>4</sub>]·2H<sub>2</sub>O</b>        |
|---------------------------------------------|--------------------------------------------------------------------------------|---------------------------------------------------------------------------------|--------------------------------------------------------------------------------|---------------------------------------------------------------------------------|
| Identification code                         | YN44                                                                           | YN45                                                                            | 15501 YN-56                                                                    | 16953 YN-132                                                                    |
| Empirical formula                           | C <sub>17</sub> H <sub>18</sub> CuN <sub>4</sub> O <sub>8</sub> S <sub>2</sub> | C <sub>17</sub> H <sub>22</sub> CuN <sub>4</sub> O <sub>10</sub> S <sub>2</sub> | C <sub>22</sub> H <sub>24</sub> CuN <sub>2</sub> O <sub>8</sub> S <sub>2</sub> | C <sub>14</sub> H <sub>20</sub> CuN <sub>2</sub> O <sub>12</sub> S <sub>2</sub> |
| Formula weight                              | 534.01                                                                         | 570.04                                                                          | 572.09                                                                         | 535.98                                                                          |
| Temperature/K                               | 100(2)                                                                         | 100(2)                                                                          | 100(2)                                                                         | 100(2)                                                                          |
| Crystal system                              | orthorhombic                                                                   | orthorhombic                                                                    | monoclinic                                                                     | monoclinic                                                                      |
| Space group                                 | Pnma                                                                           | Cmc2 <sub>1</sub>                                                               | I2/a                                                                           | P2 <sub>1</sub> /c                                                              |
| a/Å                                         | 7.14100(10)                                                                    | 23.4161(3)                                                                      | 11.51090(10)                                                                   | 8.32260(10)                                                                     |
| b/Å                                         | 23.8599(4)                                                                     | 13.29850(10)                                                                    | 21.0713(2)                                                                     | 16.3127(2)                                                                      |
| c/Å                                         | 12.48922(19)                                                                   | 7.23910(10)                                                                     | 20.3473(3)                                                                     | 7.22800(10)                                                                     |
| α/°                                         | 90                                                                             | 90                                                                              | 90                                                                             | 90                                                                              |
| β/°                                         | 90                                                                             | 90                                                                              | 98.7190(10)                                                                    | 100.9120(10)                                                                    |
| γ/°                                         | 90                                                                             | 90                                                                              | 90                                                                             | 90                                                                              |
| Volume/Å <sup>3</sup>                       | 2127.96(6)                                                                     | 2254.25(5)                                                                      | 4878.20(10)                                                                    | 963.56(2)                                                                       |
| Z                                           | 4                                                                              | 4                                                                               | 8                                                                              | 2                                                                               |
| ρ <sub>calc</sub> /g/cm <sup>3</sup>        | 1.667                                                                          | 1.680                                                                           | 1.558                                                                          | 1.847                                                                           |
| μ/mm <sup>-1</sup>                          | 3.773                                                                          | 3.670                                                                           | 3.310                                                                          | 4.292                                                                           |
| F(000)                                      | 1092.0                                                                         | 1172.0                                                                          | 2360.0                                                                         | 550.0                                                                           |
| Crystal size/mm <sup>3</sup>                | 0.18 × 0.16 × 0.1                                                              | 0.1 × 0.08 × 0.06                                                               | 0.08 × 0.07 × 0.04                                                             | 0.24 × 0.2 × 0.12                                                               |
| Radiation                                   | CuKα (λ = 1.54184)                                                             | CuKα (λ = 1.54184)                                                              | CuKα (λ = 1.54184)                                                             | CuKα (λ = 1.54184)                                                              |
| 2θ range for data collection/°              | 7.41 to 139.888                                                                | 7.55 to 134.982                                                                 | 6.074 to 139.988                                                               | 10.826 to 154.428                                                               |
| Index ranges                                | −8 ≤ h ≤ 6, −29 ≤ k ≤ 27, −15 ≤ l ≤ 15                                         | −28 ≤ h ≤ 27, −12 ≤ k ≤ 15, −8 ≤ l ≤ 8                                          | −14 ≤ h ≤ 14, −25 ≤ k ≤ 25, −24 ≤ l ≤ 24                                       | −10 ≤ h ≤ 10, −20 ≤ k ≤ 20, −7 ≤ l ≤ 9                                          |
| Reflections collected                       | 7905                                                                           | 8503                                                                            | 32341                                                                          | 14210                                                                           |
| Independent reflections                     | 2068 [R <sub>int</sub> = 0.0314, R <sub>sigma</sub> = 0.0247]                  | 1940 [R <sub>int</sub> = 0.0470, R <sub>sigma</sub> = 0.0376]                   | 4625 [R <sub>int</sub> = 0.0322, R <sub>sigma</sub> = 0.0203]                  | 2023 [R <sub>int</sub> = 0.0307, R <sub>sigma</sub> = 0.0153]                   |
| Data/restraints/parameters                  | 2068/0/163                                                                     | 1940/1/175                                                                      | 4625/0/318                                                                     | 2023/0/183                                                                      |
| Goodness-of-fit on F <sup>2</sup>           | 1.050                                                                          | 1.031                                                                           | 1.060                                                                          | 1.076                                                                           |
| Final R indexes [I ≥ 2σ(I)]                 | R <sub>1</sub> = 0.0338, wR <sub>2</sub> = 0.0929                              | R <sub>1</sub> = 0.0321, wR <sub>2</sub> = 0.0821                               | R <sub>1</sub> = 0.0296, wR <sub>2</sub> = 0.0851                              | R <sub>1</sub> = 0.0254, wR <sub>2</sub> = 0.0706                               |
| Final R indexes [all data]                  | R <sub>1</sub> = 0.0357, wR <sub>2</sub> = 0.0951                              | R <sub>1</sub> = 0.0322, wR <sub>2</sub> = 0.0822                               | R <sub>1</sub> = 0.0309, wR <sub>2</sub> = 0.0861                              | R <sub>1</sub> = 0.0256, wR <sub>2</sub> = 0.0707                               |
| Largest diff. peak/hole / e Å <sup>-3</sup> | 0.56/−0.46                                                                     | 0.50/−0.56                                                                      | 0.78/−0.62                                                                     | 0.42/−0.44                                                                      |
| Flack parameter                             |                                                                                | −0.01(3)                                                                        |                                                                                |                                                                                 |
| CCDC number                                 | 2062446                                                                        | 2062447                                                                         | 2062448                                                                        | 2062451                                                                         |

## Experimental spectra and TG/dTG curves

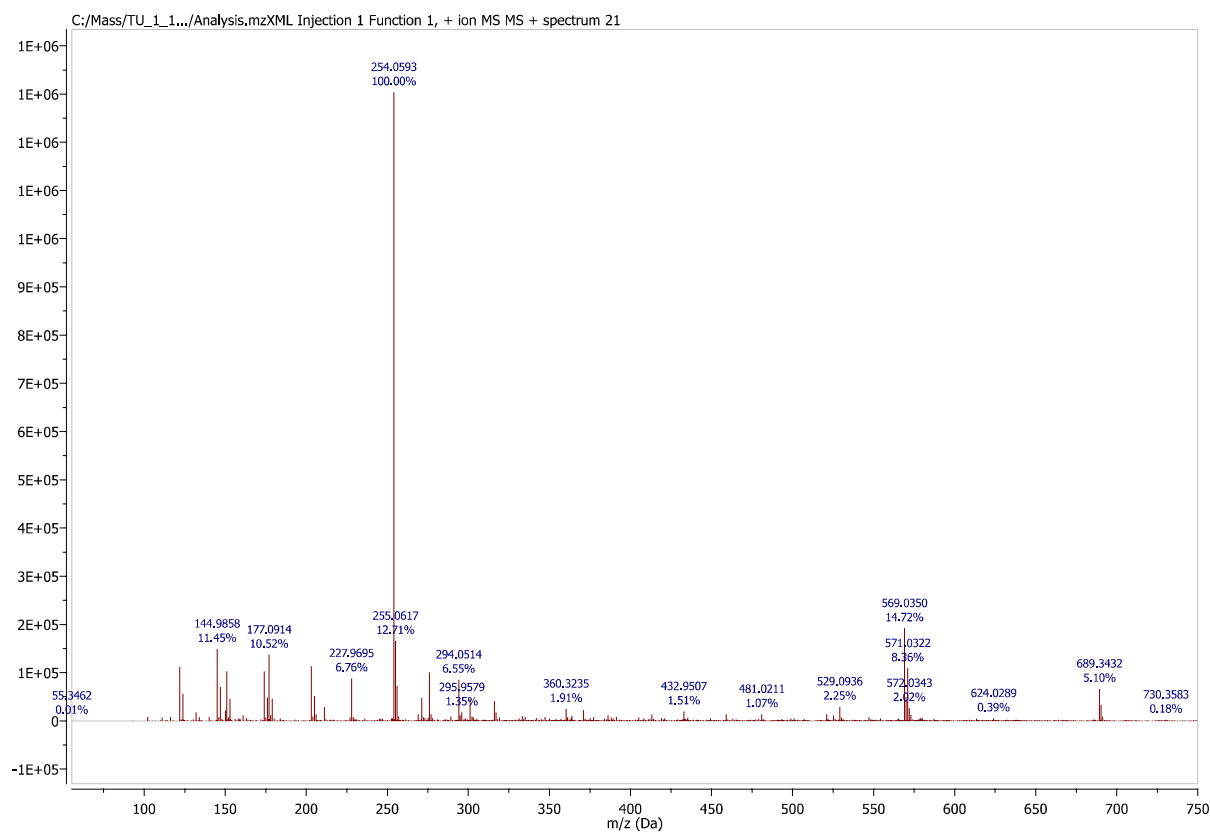

**Figure S1.** HRESI<sup>+</sup>-MS spectrum of the reaction mixture CuCl<sub>2</sub>/NCNMe<sub>2</sub>/SacNa in MeCN. The peak at m/z 254.0593 corresponds to 1:1 addition product of SacH to NCNMe<sub>2</sub> (m/z calcd for [M+H]<sup>+</sup> 254.0599).

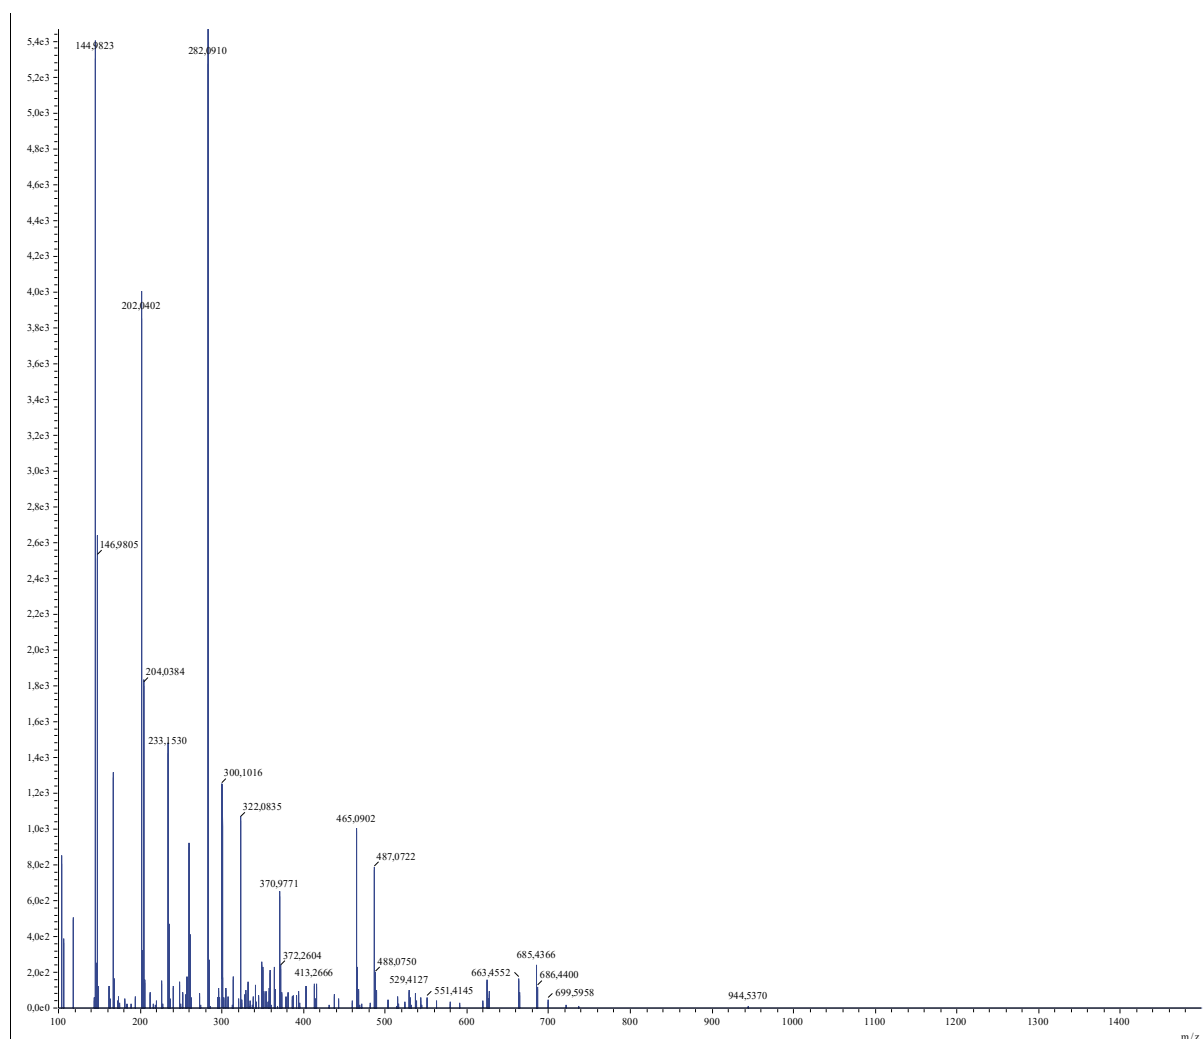

**Figure S2.** HRESI<sup>+</sup>-MS spectrum of the reaction mixture CuCl<sub>2</sub>/NCNEt<sub>2</sub>/SacNa in MeCN. The peak at  $m/z$  282.0910 corresponds to 1:1 addition product of SacH to NCNEt<sub>2</sub> ( $m/z$  calcd for [M+H]<sup>+</sup> 282.0913).

Electrospray ionization mass-spectra were obtained on a Bruker micrOTOF and Shimadzu LCMS-9030 spectrometers equipped with an electrospray ionization (ESI) source. The instruments were operated in positive ion mode using a  $m/z$  range 50–3000.

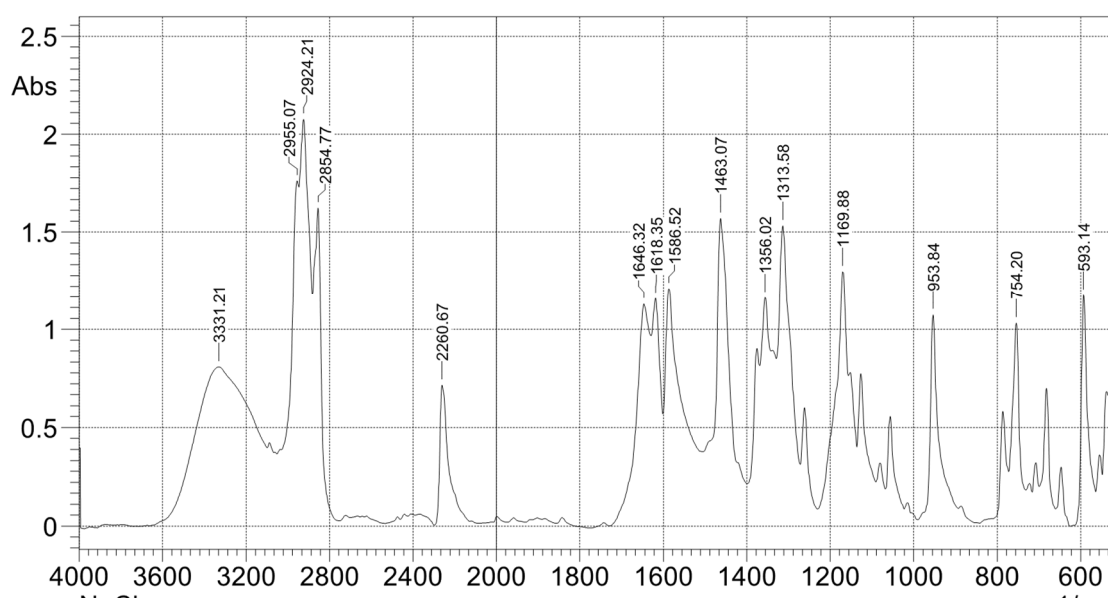

Figure S3. IR spectrum of 1 in Nujol.

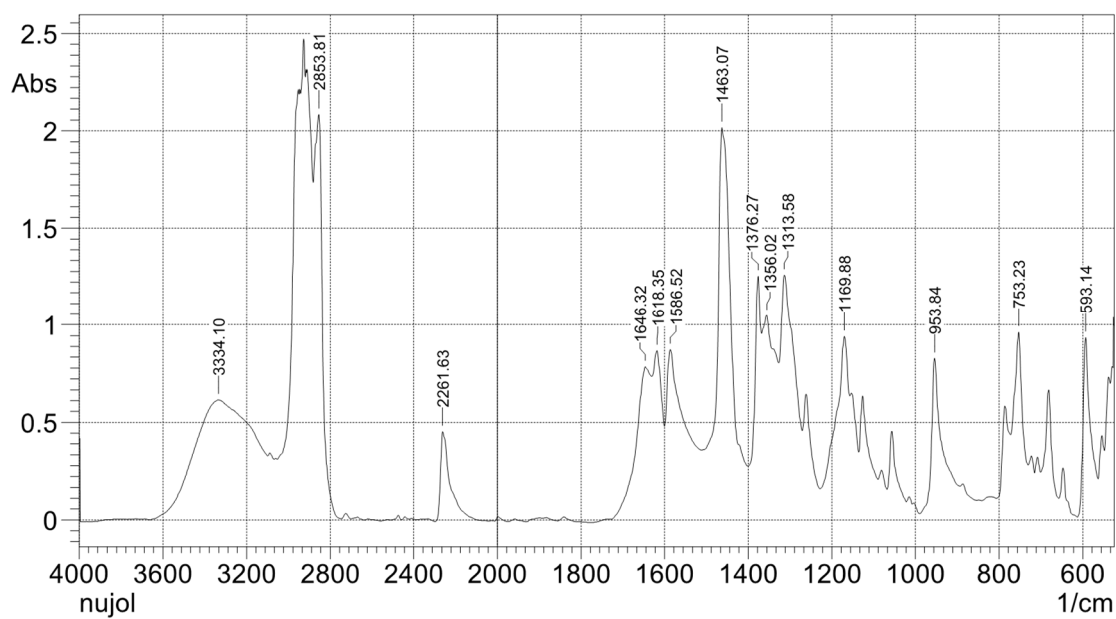Figure S4. IR spectrum of 1·2H<sub>2</sub>O in Nujol.

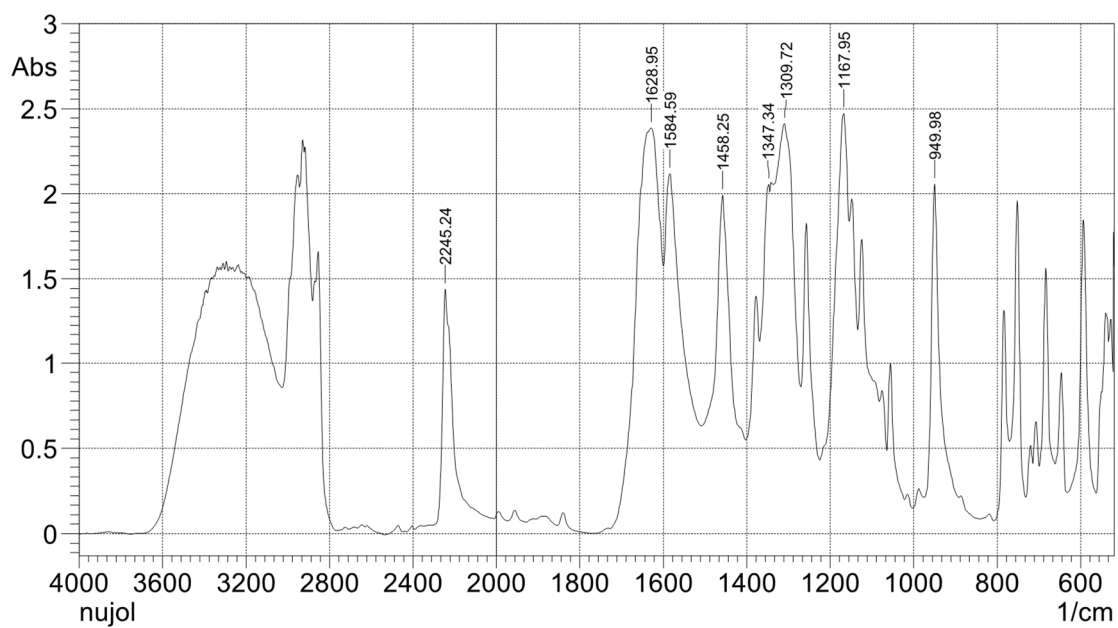

Figure S5. IR spectrum of 2 in Nujol.

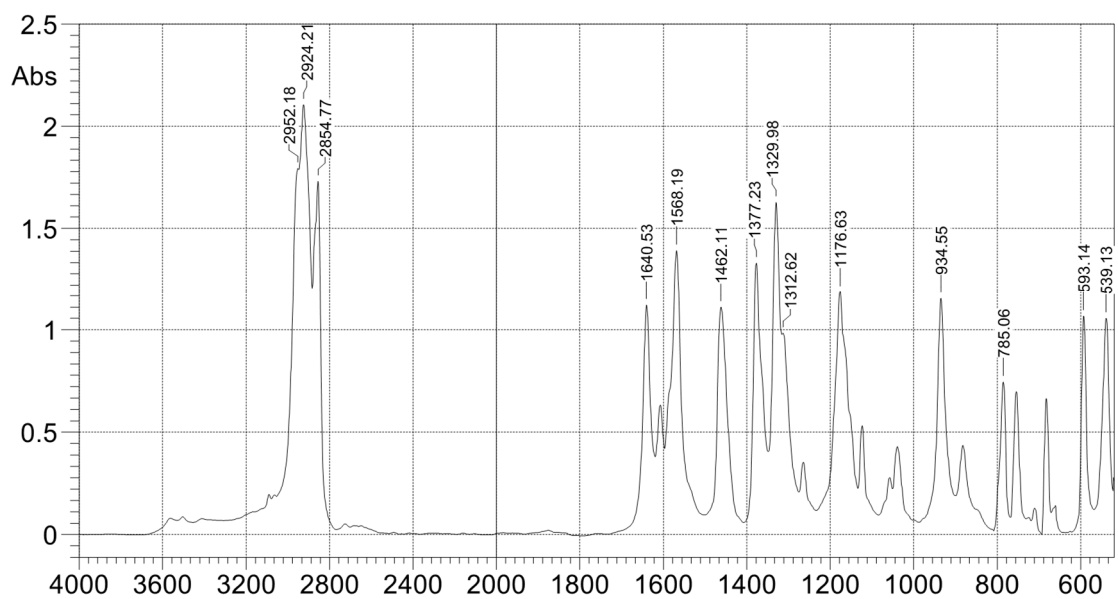

Figure S6. IR spectrum of 3-2THF in Nujol.

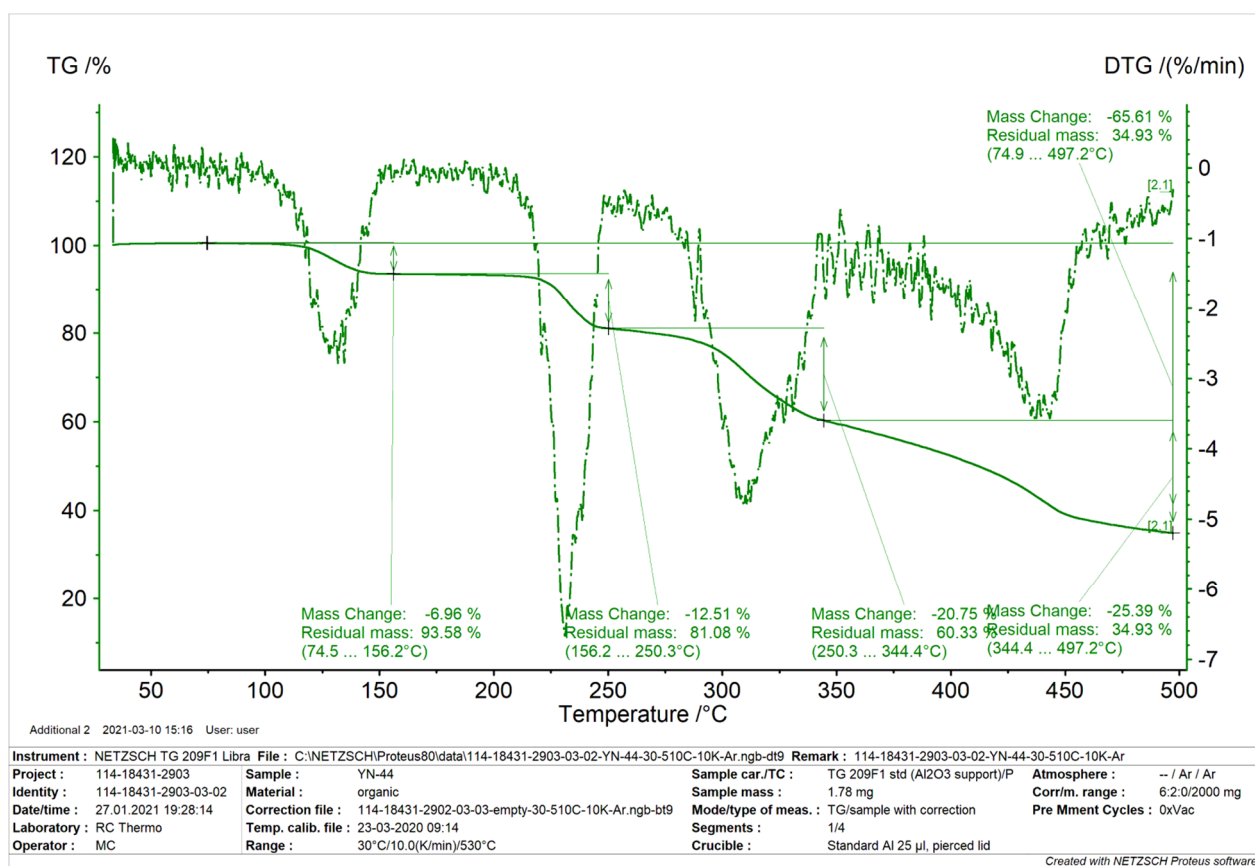

Figure S7. TG and dTG curves for 1.

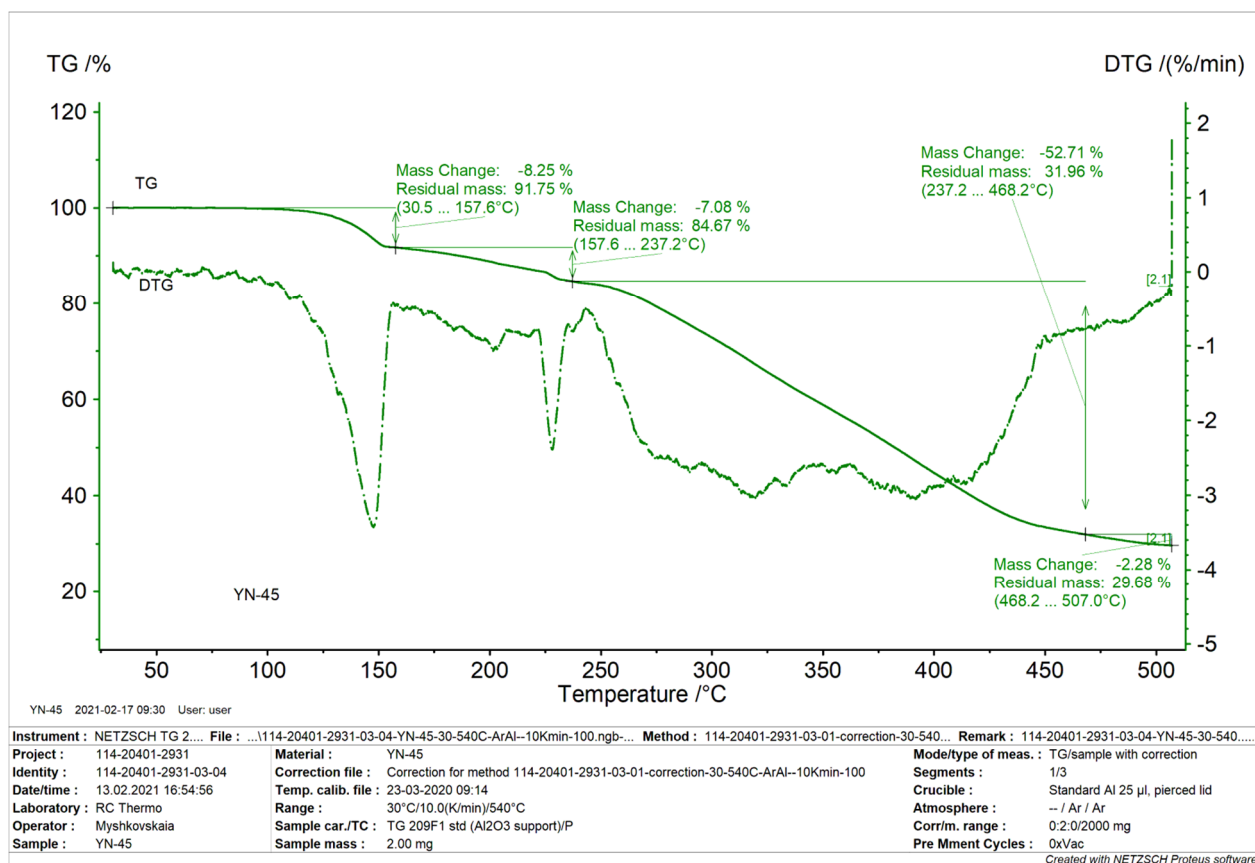Figure S8. TG and dTG curves for 1-2H<sub>2</sub>O.

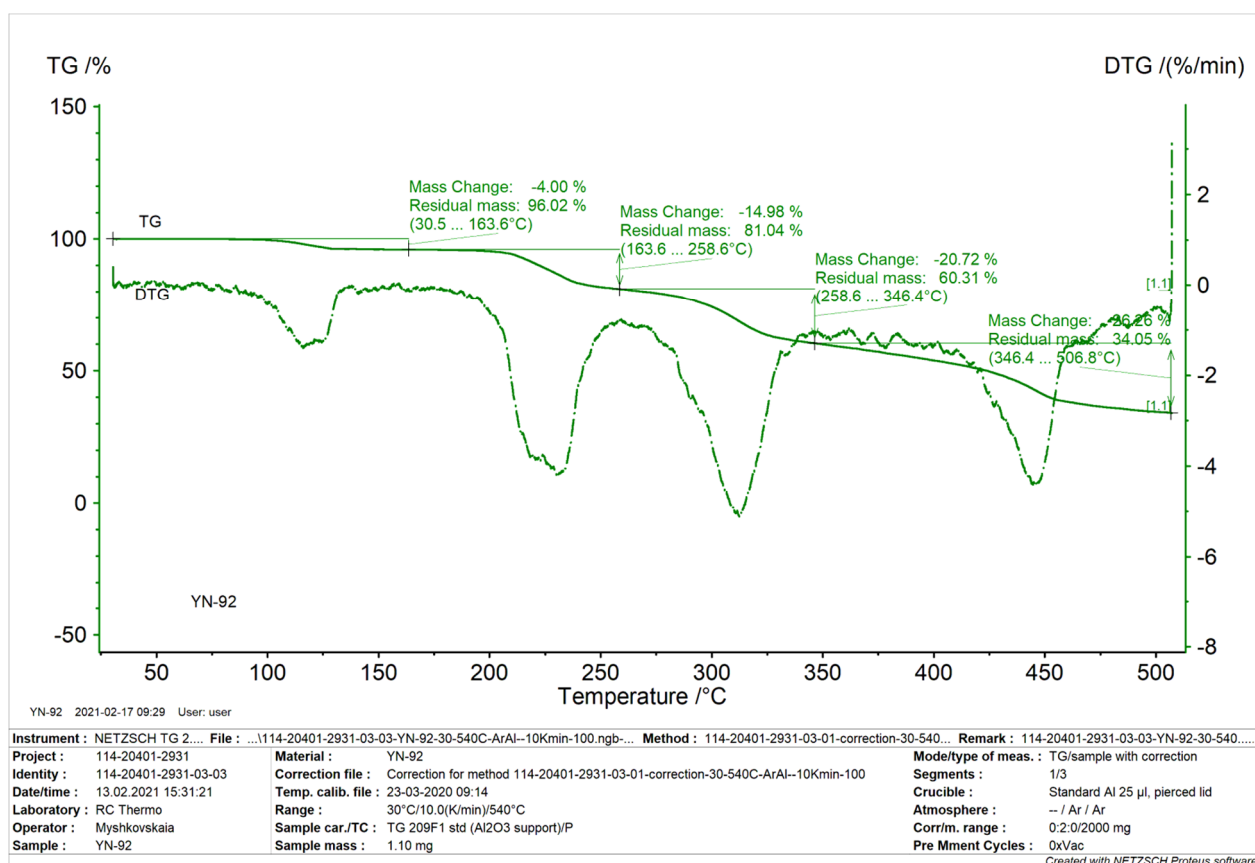

Figure S9. TG and dTG curves for 2.

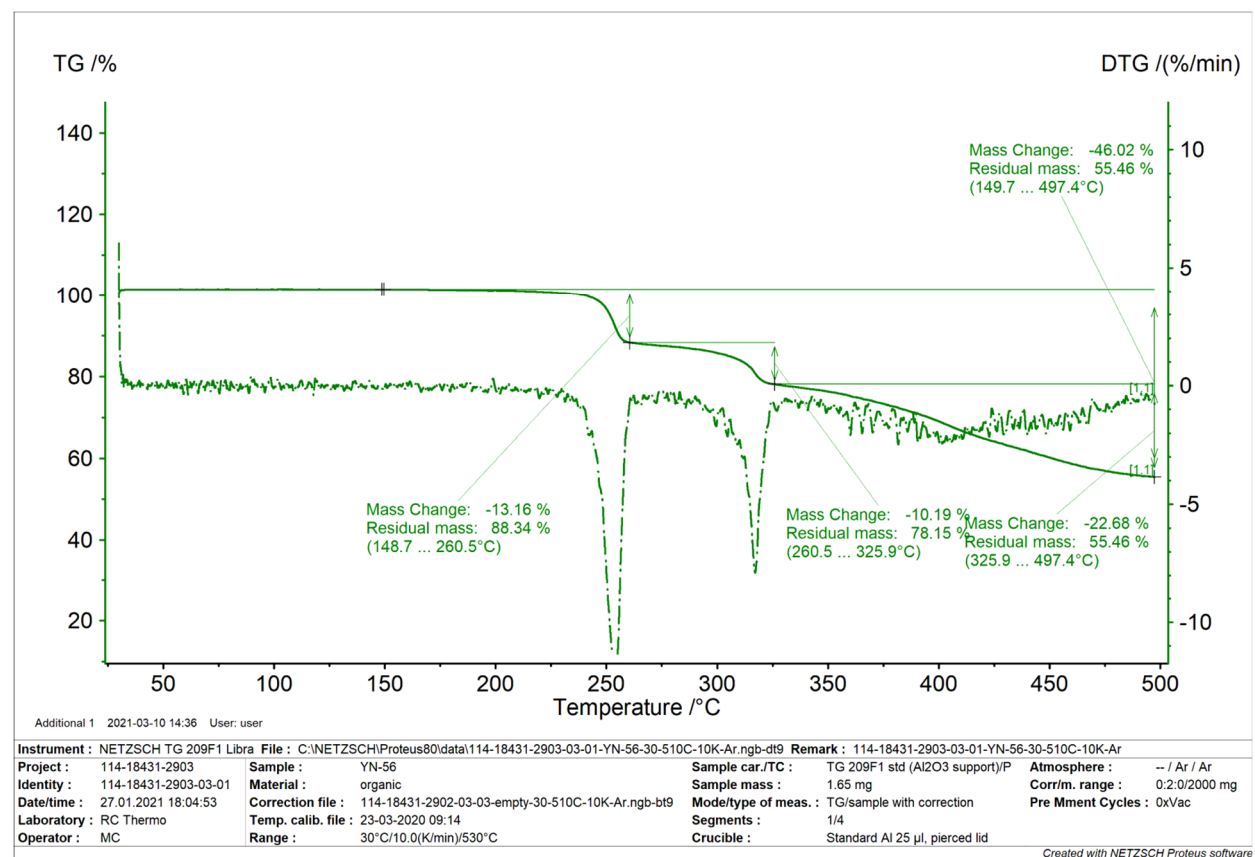

Figure S10. TG and dTG curves for 3-2THF.

### Synthesis and characterization of $[\text{Cu}(\text{sac})_2(\text{H}_2\text{O})_4]$

**Synthesis of  $[\text{Cu}(\text{sac})_2(\text{H}_2\text{O})_4]$ .**  $\text{CuCl}_2 \cdot 2\text{H}_2\text{O}$  (0.25 mmol) were dissolved in any of the following solvents – MeOH, EtOH, or MeCN (2 mL) at RT, whereupon a solution of sodium saccharinat (0.25 mmol) and  $\text{NCNC}_5\text{H}_{10}$  in MeOH, EtOH, or MeCN (2 mL) was added. The resulting mixture was left to stand for 3–5 days at RT without stirring and the pale blue prismatic crystals were precipitated; these crystals were washed by methanol and dried in air at RT. The isolated yields are 20–30%. IR in KBr (selected bands,  $\text{cm}^{-1}$ ): 33566 m, 3504 m, and 3414 m,  $\nu(\text{O}-\text{H})$ , 3097 m-s br  $\nu(\text{C}-\text{H}$  and  $\text{O}-\text{H})$ , 1619 s band 1580 m  $\nu(\text{C}=\text{O})$  and  $\delta(\text{O}-\text{H})$ , 1306 m-s  $\nu_{\text{sym}}(\text{S}=\text{O})$ , 1165 m-s  $\nu_{\text{asym}}(\text{S}=\text{O})$ .

Complex  $[\text{Cu}(\text{sac})_2(\text{H}_2\text{O})_4] \cdot 2\text{H}_2\text{O}$  contains copper(II) center in distorted octahedral environment. The Cu–N distance (2.0595(13) Å) is slightly longer than those in **1** and **1**·2H<sub>2</sub>O. Two Cu–O bonds exhibit different distances (1.9591(13) and 2.4579(16) Å) due to Jahn–Teller effect. Coordinated and solvated molecules of H<sub>2</sub>O are involved in formation of system of HB. One of H<sub>2</sub>O ligand form intramolecular HB with C=O group of sac<sup>−</sup> ligand and participates in HB with solvated H<sub>2</sub>O as HB donor. Other coordinated H<sub>2</sub>O forms intermolecular HB with O=S group of neighbor molecule of  $[\text{Cu}(\text{sac})_2(\text{H}_2\text{O})_4] \cdot 2\text{H}_2\text{O}$  and acts as a HB acceptor toward solvated H<sub>2</sub>O. In turn, solvated H<sub>2</sub>O acts as HB donor toward O=C group of sac<sup>−</sup> ligand and one H<sub>2</sub>O ligand, and is HB acceptor toward another H<sub>2</sub>O ligand. This system of HB lead to formation of wavy two-dimensional layers in the structure of  $[\text{Cu}(\text{sac})_2(\text{H}_2\text{O})_4] \cdot 2\text{H}_2\text{O}$ .

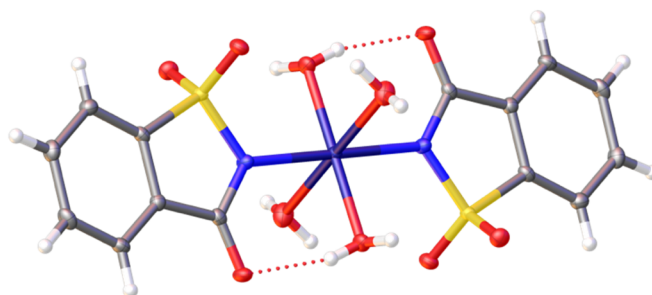

**Figure S11.** Molecular structure of  $[\text{Cu}(\text{sac})_2(\text{H}_2\text{O})_4] \cdot 2\text{H}_2\text{O}$  with the atomic numbering. Thermal ellipsoids are given at the 50% probability level. H<sub>2</sub>O hydrated molecules are omitted for clarity.



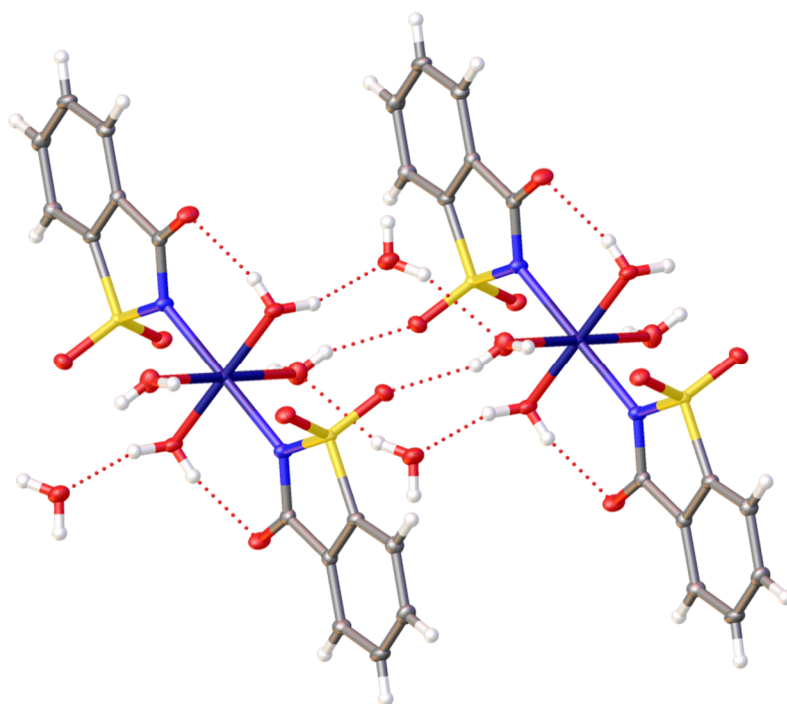

**Figure S12.** A fragment of crystal packing of  $[\text{Cu}(\text{sac})_2(\text{H}_2\text{O})_4] \cdot 2\text{H}_2\text{O}$  with the intra- and intermolecular HBs shown in dotted lines.

### Cartesian atomic coordinates

**Table S2.** Cartesian atomic coordinates for optimized equilibrium model structure 1.

| Atom | X         | Y         | Z         |
|------|-----------|-----------|-----------|
| S    | −2.880281 | 0.851824  | −0.068370 |
| O    | −2.264106 | −2.792854 | 0.436240  |
| O    | −2.351861 | 1.473455  | −1.277469 |
| O    | −3.080701 | 1.708401  | 1.095877  |
| N    | −1.980442 | −0.516669 | 0.309790  |
| C    | −2.714480 | −1.652683 | 0.242877  |
| C    | −4.128640 | −1.399826 | −0.140831 |
| C    | −5.137836 | −2.337644 | −0.292505 |
| H    | −4.934317 | −3.388688 | −0.098613 |
| C    | −6.392114 | −1.886617 | −0.695335 |
| H    | −7.204303 | −2.599138 | −0.824165 |
| C    | −6.624144 | −0.531720 | −0.939136 |
| H    | −7.613184 | −0.205901 | −1.255079 |
| C    | −5.608581 | 0.411958  | −0.785226 |
| H    | −5.780602 | 1.469994  | −0.971396 |
| C    | −4.372027 | −0.060479 | −0.390369 |
| N    | 0.004770  | 1.373185  | 1.087906  |
| N    | −0.015047 | 3.734620  | 0.367895  |
| C    | −0.006176 | 2.479200  | 0.707927  |
| C    | −1.285262 | 4.380844  | 0.039491  |
| H    | −1.455036 | 4.362665  | −1.044719 |
| H    | −1.244667 | 5.417365  | 0.393521  |
| H    | −2.101741 | 3.851104  | 0.538719  |
| C    | 1.225949  | 4.367746  | −0.076976 |
| H    | 1.262746  | 4.403201  | −1.173382 |
| H    | 1.261148  | 5.385256  | 0.329230  |

|    |           |           |           |
|----|-----------|-----------|-----------|
| H  | 2.079577  | 3.791367  | 0.291276  |
| O  | 0.007540  | −2.114629 | −0.992638 |
| H  | −0.770788 | −2.631260 | −0.692622 |
| H  | 0.785922  | −2.629360 | −0.690156 |
| Cu | 0.002796  | −0.507518 | 0.429690  |
| O  | 0.002974  | −2.070459 | 1.993769  |
| H  | −0.777653 | −2.582447 | 1.698104  |
| H  | 0.787115  | −2.579032 | 1.701190  |
| S  | 2.878579  | 0.857878  | −0.081978 |
| O  | 2.278580  | −2.785332 | 0.449540  |
| O  | 2.342715  | 1.462514  | −1.296589 |
| O  | 3.077063  | 1.731579  | 1.069686  |
| N  | 1.986525  | −0.510889 | 0.312284  |
| C  | 2.724783  | −1.644492 | 0.250931  |
| C  | 4.138266  | −1.387892 | −0.132864 |
| C  | 5.153184  | −2.321487 | −0.271710 |
| H  | 4.954442  | −3.371824 | −0.069210 |
| C  | 6.407080  | −1.867070 | −0.671916 |
| H  | 7.223938  | −2.576073 | −0.790134 |
| C  | 6.633242  | −0.512966 | −0.925444 |
| H  | 7.622407  | −0.184262 | −1.237975 |
| C  | 5.611769  | 0.426415  | −0.784933 |
| H  | 5.779430  | 1.483975  | −0.977705 |
| C  | 4.375559  | −0.049501 | −0.393112 |
